# Supplementary material for: Molecular properties affecting the hydration of acid–base clusters
Source: Royal Society of Chemistry journal article supplement (doi:10.1039/d1cp01704g), 2021-01-01
Supplement: d1cp01704g1.pdf [file d1cp01704g1.pdf]

## Supporting information for Molecular properties affecting the hydration of acid–base clusters

Nanna Myllys, Deanna Myers, Sabrina Chee and James N. Smith

Binding enthalpies and entropies for hydrated base monomers are given in Table S1 and for sulfuric acid–base heterodimers in Table S2.

Table S1: Calculated binding enthalpies ( $\Delta H$  in kcal/mol) and entropies ( $\Delta S$  in cal/(mol·K)) for hydrated base monomer 1BASE $n$ W.

| 1BASE $n$ W<br>$n$ | AMM        |            | DMA        |            | TMAO       |            | GUA        |            |
|--------------------|------------|------------|------------|------------|------------|------------|------------|------------|
|                    | $\Delta H$ | $\Delta S$ |
| 1                  | -4.7       | -21.1      | -6.2       | -24.5      | -11.7      | -27.8      | -9.0       | -30.6      |
| 2                  | -12.1      | -55.2      | -13.6      | -54.1      | -21.8      | -56.4      | -17.9      | -62.2      |
| 3                  | -20.8      | -87.4      | -22.2      | -87.6      | -30.7      | -86.8      | -26.1      | -93.1      |
| 4                  | -27.4      | -113.1     | -29.9      | -117.6     | -38.6      | -120.2     | -35.3      | -123.4     |
| 5                  | -35.9      | -147.8     | -38.5      | -158.8     | -48.2      | -156.3     | -43.5      | -155.8     |
| 6                  | -44.9      | -183.5     | -48.8      | -192.6     | -59.4      | -197.1     | -54.9      | -198.9     |
| 7                  | -58.8      | -229.9     | -59.7      | -230.5     | -69.1      | -232.1     | -65.3      | -237.7     |
| 8                  | -66.6      | -256.4     | -68.5      | -256.8     | -79.3      | -266.6     | -74.5      | -270.1     |
| 9                  | -74.4      | -285.8     | -77.7      | -292.8     | -89.1      | -301.9     | -87.1      | -302.4     |
| 10                 | -84.6      | -323.2     | -86.4      | -329.1     | -96.8      | -328.6     | -96.2      | -336.4     |
| 11                 | -96.8      | -371.4     | -96.9      | -365.5     | -108.9     | -368.6     | -102.6     | -358.3     |
| 12                 | -104.0     | -396.6     | -107.6     | -404.8     | -117.3     | -402.7     | -114.3     | -404.7     |
| 13                 | -115.2     | -438.1     | -115.2     | -433.2     | -127.2     | -438.7     | -124.0     | -442.3     |
| 14                 | -123.3     | -462.7     | -126.8     | -473.7     | -137.4     | -470.6     | -132.9     | -480.3     |
| 15                 | -134.9     | -507.8     | -135.3     | -507.4     | -147.4     | -508.2     | -143.6     | -517.3     |
| 16                 | -143.8     | -542.3     | -145.3     | -540.0     | -156.1     | -541.8     | -151.7     | -544.0     |
| 17                 | -153.3     | -574.5     | -154.7     | -574.7     | -167.7     | -580.1     | -163.4     | -586.0     |
| 18                 | -161.3     | -602.8     | -164.1     | -610.5     | -176.7     | -615.5     | -176.5     | -619.5     |
| 19                 | -172.0     | -640.3     | -174.6     | -642.0     | -186.3     | -649.9     | -182.6     | -648.8     |
| 20                 | -178.4     | -664.3     | -184.9     | -681.7     | -198.0     | -689.6     | -196.8     | -691.7     |

Table S2: Calculated binding enthalpies ( $\Delta H$  in kcal/mol) and entropies ( $\Delta S$  in cal/(mol·K)) for hydrated sulfuric acid–base heterodimer 1SA1BASE $n$ W.

| 1SA1BASE $n$ W | SA-AMM     |            | SA-DMA     |            | SA-TMAO    |            | SA-GUA     |            |
|----------------|------------|------------|------------|------------|------------|------------|------------|------------|
| $n$            | $\Delta H$ | $\Delta S$ |
| 0              | -15.1      | -29.2      | -22.2      | -30.3      | -32.2      | -34.9      | -29.4      | -30.4      |
| 1              | -25.1      | -62.5      | -35.3      | -66.1      | -41.4      | -62.9      | -41.2      | -68.6      |
| 2              | -39.1      | -95.1      | -47.2      | -100.2     | -53.1      | -98.4      | -57.1      | -102.3     |
| 3              | -49.8      | -124.5     | -58.0      | -131.3     | -64.7      | -133.8     | -70.8      | -137.1     |
| 4              | -59.7      | -160.3     | -66.8      | -161.2     | -74.6      | -165.2     | -80.1      | -166.7     |
| 5              | -71.6      | -195.7     | -78.8      | -199.7     | -84.7      | -195.8     | -89.7      | -199.9     |
| 6              | -81.0      | -227.4     | -87.2      | -225.3     | -96.4      | -235.9     | -103.2     | -240.1     |
| 7              | -95.8      | -273.9     | -100.2     | -271.4     | -105.9     | -262.7     | -113.1     | -272.3     |
| 8              | -105.0     | -301.2     | -109.3     | -302.0     | -115.9     | -297.3     | -123.9     | -309.3     |
| 9              | -114.3     | -333.5     | -118.8     | -337.1     | -125.5     | -332.4     | -132.8     | -337.7     |
| 10             | -124.2     | -365.6     | -128.8     | -369.5     | -137.8     | -375.6     | -144.5     | -379.1     |
| 11             | -134.1     | -395.8     | -140.3     | -411.8     | -144.8     | -401.5     | -154.4     | -414.8     |
| 12             | -146.4     | -444.1     | -147.8     | -439.4     | -155.7     | -431.5     | -164.1     | -446.7     |
| 13             | -155.0     | -473.4     | -159.6     | -479.0     | -166.6     | -472.4     | -176.3     | -489.5     |
| 14             | -167.6     | -512.5     | -172.1     | -520.3     | -176.5     | -507.4     | -183.0     | -512.8     |
| 15             | -179.3     | -551.3     | -178.2     | -544.1     | -188.2     | -545.2     | -195.8     | -557.2     |
| 16             | -184.4     | -575.3     | -190.6     | -587.2     | -195.5     | -578.5     | -206.1     | -589.5     |
| 17             | -196.9     | -613.3     | -199.7     | -618.5     | -207.3     | -616.2     | -213.6     | -620.2     |
| 18             | -207.1     | -652.9     | -206.8     | -651.2     | -216.3     | -648.3     | -224.2     | -655.0     |
| 19             | -215.6     | -683.1     | -217.0     | -685.7     | -227.7     | -688.8     | -234.4     | -687.8     |
| 20             | -227.4     | -725.3     | -227.1     | -722.6     | -238.0     | -725.0     | -245.4     | -732.1     |
